# Supplementary material
Source: publisher figshare collection journal article supplement (https://geolsoc.figshare.com/ndownloader/files/26673891)
Supplement: Supplementary file 1 [file 26673891]

**Appendix 1**

| **Taxa** | | **Localities** | | | | |
| --- | --- | --- | --- | --- | --- | --- |
|  |  | **P2** | **P3** | **P6** | **P7** | **P8** |
| **PISCES** | Pisces indet. | - | - | - | - | x |
| **ANURA** | Calyptocephalellidae | - | x | x | x | x |
| **LACERTILIA** | Lacertilia indet. | - | - | - | - | x |
| **AVES** | Aves indet. | x | x | x | x | x |
|  | Phorusrhacidae | - | - | - | - | x |
| **MAMMALIA** |  |  |  |  |  |  |
| **Metatheria** | Sparassodonta | x | x | x | x | x |
|  | Paucituberculata | x | x | x | x | x |
| **Xenarthra, Cingulata** | Propalaehoplophoridae indet. | x | x | x | x | x |
|  | *Cochlops* sp. | - | - | - | - | x |
|  | *Peltephilus* sp. | x | - | - | x | x |
|  | *Vetelia* sp. | x | - | - | - | - |
|  | *Prozaedyus* sp. | x | x | x | x | x |
|  | *Proeutatus cf. oenophorus* | x | x | x | x | x |
|  | *Stenotatus patagonicus* | x | - | - | x | x |
| **Xenarthra, Folivora** | Megatherioidea indet. | x | x | x | x | x |
|  | Planopinae indet. | x | x | - | - | - |
| **Litopterna, Proterotheriidae** | cf. *Thoatherium minusculum* | x | - | - | x | - |
|  | *Anisolophus* cf. *australis* | x | - | - | - |
|  | *Anisolophus* sp. | - | - | x | - |
|  | *Diadiaphorus majusculus* | - | - | - | x |
|  | *Tetramerorhinus* sp. | - | - | - | x |
| **Litopterna, Macraucheniidae** | *cf. Theosodon* | - | - | - | x | x |
| **Notoungulata, Toxodontia** | *Nesodon imbricatus* | x | x | x | x | x |
|  | *Adinotherium ovinum* | x | x | x | x | x |
| **Notoungulata, Typotheria** | *Protypotherium* sp. | x | x | x | x | x |
|  | *Interatherium* sp. | x | x | x | x | x |
|  | *Hegetotherium mirabile* | x | x | - | x | x |
|  | *Pachyrukhos moyani* | x | x | x | x | - |
| **Astrapotheria** | Astrapotheriidae indet | x | - | x | x | x |
| **Rodentia, Octodontoidea** | *Acarechimys minutus* | x | x | - | x | x |
|  | *Acarechimys minutissimus* | x | - | - | x |
|  | *Acaremys?* | x | - | - | x |
|  | Adelphomyinae? | x | x | x | x |
|  | *Spaniomys* sp. | - | x | - | x |
|  | *Stichomys?* | - |  | x | x |
| **Rodentia, Cavioidea** | *Eocardia* sp. | - | x | - | x | x |
|  | *Eocardia montana* | x | - | x | x | x |
|  | *Eocardia excavata* | - | x | - | - |
|  | *Eocardia fissa* | - | - | - | x |
|  | *Neoreomys australis* | x | x | - | x |
| **Rodentia, Chinchilloidea** | *Prolagostomus* sp. | x | x | x | - |
|  | *Pliolagostomus?* | x | x | x | - |
|  | *Perimys* sp. | - | x | - | x |
|  | *Scleromys*? | - | x | - | x |
| **Rodentia**, **Erethizontoidea** | *Steiromys* sp. | - | - | - | x |
